# Supplementary material for: In situ generation of gold nanoparticles on a protein surface: Fischer carbene complex as reducing agent
Source: Royal Society of Chemistry journal article supplement (doi:10.1039/b606498a), 2006-01-01
Supplement: b606498a.pdf [file b606498a.pdf]

## Electronic Supplementary Information

# *In Situ* Generation of Gold Nanoparticle on Protein Surface: Fischer Carbene Complex as Reducing Agent

Debasis Samanta, Sudeshna Sawoo and Amitabha Sarkar\*

Department of Organic Chemistry, Indian Association for the Cultivation of Science, Jadavpur,  
Kolkata-700032, India.

E-mail: oca@iacs.res.in

### A. Synthesis of carbene complex 1

*Scheme S1.* Synthesis of Fischer carbene complex 1

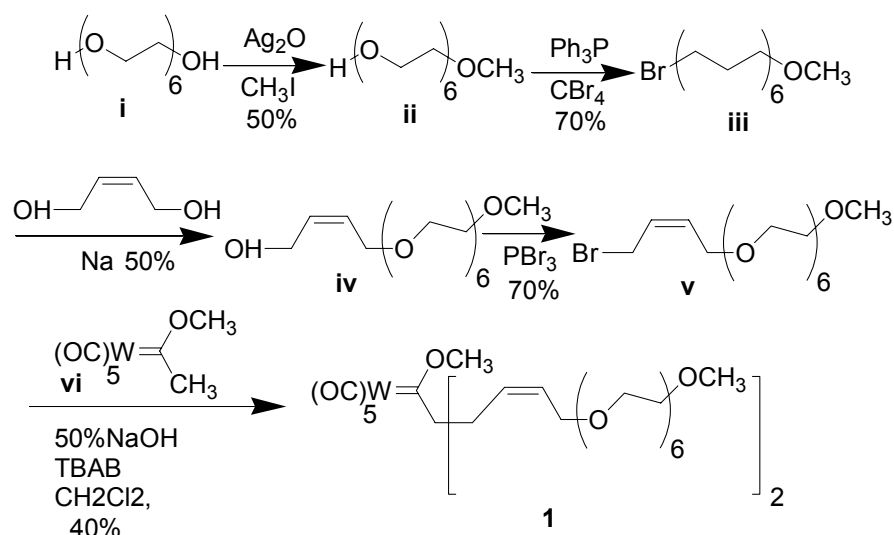

2-[2-(2-{2-[2-(2-Methoxy-ethoxy)-ethoxy]-ethoxy]-ethoxy)-ethoxy]-ethanol **ii**. To a solution of hexa(ethylene glycol) **i** (5.64g, 5.04 mL, 20 mmol) in dry dichloromethane (60 mL), silver oxide (5.1 g, 22

# Supplementary Material (ESI) for Chemical Communications

# This journal is (c) The Royal Society of Chemistry 2006

mmol) was added portionwise for 1h at room temperature while stirring. Methyl iodide (3.4 g, 1.5mL, 24 mmol) was then added dropwise at 0 °C. Stirring was continued for 24 h. The reaction mixture was filtered through cellite, washed with dichloromethane (3 x 10 mL). Removal of the solvent and flash column chromatography of the residual mass using dichloromethane/methanol (95:5) afforded the product **ii** (2.9 g, 50%) as colorless liquid; IR:  $\nu_{\max}$  3365  $\text{cm}^{-1}$ ;  $^1\text{H}$  NMR (300 MHz,  $\text{CDCl}_3$ ):  $\delta$  3.33 (3H, s), 3.58 (24H, m);  $^{13}\text{C}$  NMR (75 MHz,  $\text{CDCl}_3$ ):  $\delta$  58.1, 60.7, 69.7, 71.1, 71.9; Anal. Calcd. for  $\text{C}_{13}\text{H}_{28}\text{O}_7$ : C, 52.69; H, 9.52; Found: C, 52.74; H, 9.48.

**1-Bromo-2-[2-(2-{2-[2-(2-methoxy-ethoxy)-ethoxy]-ethoxy}-ethoxy)-ethoxy]-ethane iii.** To a stirred solution of hexa(ethylene glycol) monomethyl ether, **ii** (593 mg, 2 mmol) in dry dichloromethane (10 mL) under argon atmosphere carbon tetrabromide (0.8 g, 2.4 mmol) was added. Reaction mixture was cooled to 0 °C and triphenyl phosphine (0.8 g, 3 mmole) taken in dry dichloromethane (2 mL) was added dropwise to it. After stirring for 3 h the solvent was evaporated out. Ether (5 mL) was added, kept in refrigerator for 15 min and filtered. The same process (addition of ether, filtration and evaporation of solvent) was repeated thrice. The residue was subjected to flash column chromatography using dichloromethane/methanol (96:4) which afforded the colorless liquid product **iii** (502 mg, 70%).  $^1\text{H}$  NMR (300 MHz,  $\text{CDCl}_3$ ):  $\delta$  3.37 (3H, s), 3.47 (2H, t, J = 6Hz), 3.62 (20H, m), 3.80 (2H, t, J = 6Hz);  $^{13}\text{C}$  NMR (75 MHz,  $\text{CDCl}_3$ ):  $\delta$  30.1, 58.8, 70.3, 70.4, 70.6, 71.7; Anal. Calcd. for  $\text{C}_{13}\text{H}_{27}\text{BrO}_6$ : C, 43.46; H, 7.58; Found: C, 43.59; H, 7.66.

**4-{2-[2-(2-{2-[2-(2-Methoxy-ethoxy)-ethoxy]-ethoxy}-ethoxy)-ethoxy]-ethoxy}-but-2-en-1-ol iv.**

Sodium metal (35 mg, 1.5 mmol) was added in small pieces to *cis*-2-butene-1,4-diol (616 mg, 7 mmol) for 4 h with stirring and was heated at 88 °C for 1 h. To it, the bromo compound **iii** (359 mg, 1 mmol) was added dropwise. Heating was continued at 88 °C for 5 h. Reaction mixture was allowed to come at room temperature and purified by flash column chromatography using dichloromethane/methanol as eluting solvent (95:5) provided the product **iv** (183 mg, 50%) as colorless liquid. IR:  $\nu_{\max}$  3390  $\text{cm}^{-1}$ ;  $^1\text{H}$  NMR (300 MHz,  $\text{CDCl}_3$ ):  $\delta$  3.37 (3H, s), 3.62 (24H, m), 4.11 (2H, d, J = 6.2Hz), 4.19 (2H, d, J = 6.2Hz), 5.70 (1H, m), 5.82 (1H, m);  $^{13}\text{C}$  NMR (75 MHz,  $\text{CDCl}_3$ ):  $\delta$  58.3, 58.9, 61.5, 66.5, 69.2, 70.1, 70.3, 70.4, 71.8, 72.4, 127.9, 132.5; Anal. Calcd. for  $\text{C}_{17}\text{H}_{34}\text{O}_8$ : C, 55.72; H, 9.35; Found: C, 55.78; H, 9.37.

**1-Bromo-4-{2-[2-(2-{2-[2-(2-methoxy-ethoxy)-ethoxy]-ethoxy}-ethoxy)-ethoxy]-ethoxy}-but-2-ene v.**

Phosphorous tribromide (100 mg, 0.375 mmol) was added drop wise to an ice-cold solution of alcohol **iv**

# Supplementary Material (ESI) for Chemical Communications

# This journal is (c) The Royal Society of Chemistry 2006

(137 mg, 0.375 mmol) in dry dichloromethane (1 mL). Stirring was continued at 0 °C for 30 min. Then methanol (1 mL) was added drop wise at 0 °C. Solvent was evaporated and the residue was subjected to flash column chromatography using acetone/pet ether (30:70) as eluting solvent to obtain pure product **v** (112 mg, 70%) as colorless liquid. <sup>1</sup>H NMR (300 MHz, CDCl<sub>3</sub>):  $\delta$  3.31 (3H, s), 3.56 (24H, m), 3.94 (2H, d, J = 6Hz), 4.10 (2H, d, J = 6Hz), 5.72 (1H, m), 5.87 (1H, m); <sup>13</sup>C NMR (75 MHz, CDCl<sub>3</sub>):  $\delta$  26.4, 58.9, 65.9, 69.6, 70.5, 70.4, 71.8, 128.1, 131.1; Anal. Calcd. for C<sub>17</sub>H<sub>33</sub>BrO<sub>7</sub>: C, 47.56; H, 7.75; Found: C, 47.65; H, 7.80.

**(CO)<sub>5</sub>W=C(OCH<sub>3</sub>)CH[(CH<sub>2</sub>CH=CHCH<sub>2</sub>(OCH<sub>2</sub>CH<sub>2</sub>)<sub>6</sub>OCH<sub>3</sub>]<sub>2</sub> 1.** Tetrabutylammonium bromide (3.15 mg, 0.015 mmol) and 50% aqueous sodium hydroxide (1 drop) was added to a stirred solution of carbene complex **vi** (prepared according to standard procedure<sup>1</sup>) (64.31 mg, 0.15 mmol) in dry dichloromethane (1 mL) under argon atmosphere. Bromo compound **v** (290 mg, 0.68 mmol) was added to it and stirred for 6h. Dried over sodium sulphate, solvent was evaporated out and the residue was subjected to flash column chromatography using acetone/pet ether (30:70) to obtain the pure product **1** (64 mg, 40%) as yellow liquid. IR:  $\nu_{\text{max}}$  (cm<sup>-1</sup>) 1936, 2067; <sup>1</sup>H NMR (300 MHz, CDCl<sub>3</sub>):  $\delta$  1.90 (2H, m), 2.30 (2H, m), 3.37 (6H, s), 3.63 (48H, m), 4.02 (4H, d, J = 6Hz), 4.12 (1H, p, J = 6Hz), 4.62 (3H, s), 5.58 (4H, m); <sup>13</sup>C NMR (75 MHz, CDCl<sub>3</sub>):  $\delta$  30.01, 59.3, 66.9, 69.7, 69.9, 70.8, 70.9, 71.0, 71.9, 72.2, 128.8, 129.5, 197.4, 203.3, 341.6; Anal. Calcd. for C<sub>42</sub>H<sub>70</sub>O<sub>20</sub>W: C, 46.76; H, 6.54; Found: C, 46.85; H, 6.46.

## B. Preparation and characterization of BSA-carbene conjugate 2

Protein-carbene conjugate was prepared and characterised by the method described by Jaouen and others.<sup>2</sup> Reaction of the protein BSA (bovine serum albumin) with carbene complex **1** was performed in borate buffer (at pH 9). Thus, a solution of BSA (100  $\mu$ M, 1 ml) and a solution of carbene complex **1** (6000  $\mu$ M, 1 ml) was incubated for 6 h in borate buffer at 25 °C. The reaction medium was applied to a gel filtration column packed with Sephadex™ G-50 to separate protein carbene conjugate from unreacted carbene complex. Two clearly separated yellow bands were thus observed in the column; the upper band corresponds to the unreacted carbene complex and the lower band corresponds to the protein-carbene conjugate. A characteristic shift of the wavenumber of the 2 prominent  $\nu$ (CO) bands was observed by IR upon conversion of the methoxycarbene into the protein carbene conjugate (Figure

S1). The UV-vis spectrum of protein carbene conjugate was also very similar to that of the aminocarbene complex generated by reaction of methoxycarbene complex with n-butylamine. Overlapping of two curves in the CD spectra (Fig. S2) reveals that conformation of protein remains unaltered after conjugation.

Quantification of the number of amino carbene adducts per protein molecule was done by the method described by Jaouen and others.<sup>2</sup> First, the concentration of protein was measured by the colorimetric assay described by Bradford.<sup>3</sup> The concentration of aminocarbene complex was then determined spectroscopically, taking the adduct generated *in situ* by the reaction of carbene complex 7 with an excess of n-butylamine [ $\epsilon$  (332 nm) = 5900 l mol<sup>-1</sup> cm<sup>-1</sup>] as standard. It was thus estimated that 15 out of 60 amino groups of BSA were converted to aminocarbenes.

**Figure S1.** IR spectra of (A) carbene complex 1 (B) Carbene complex after reaction with BuNH<sub>2</sub> (C) after reaction with BSA

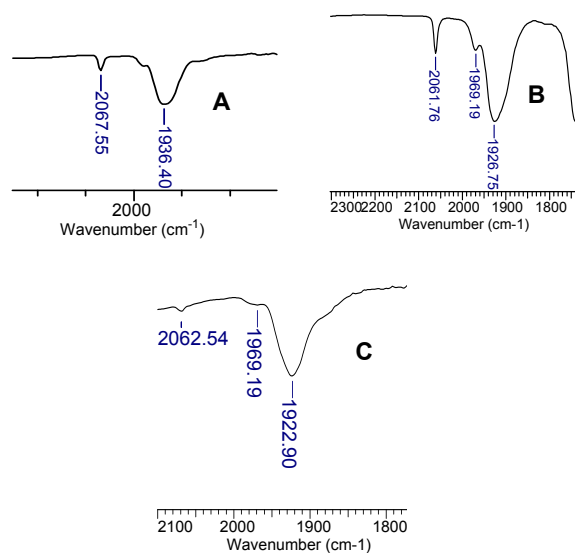

**Figure S2.** CD spectra of BSA (i) before reaction with carbene (red curve) (ii) after reaction with carbene (black curve)

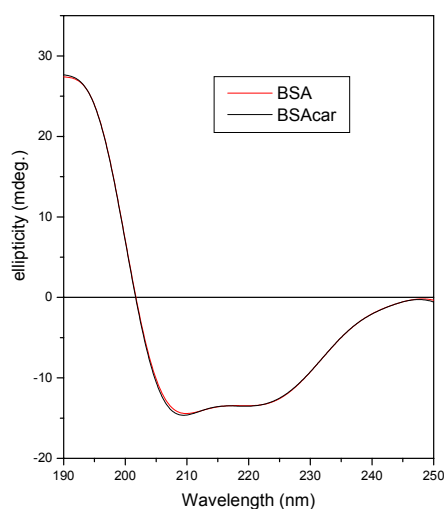

### C. Synthesis of gold nanoparticle from BSA-carbene conjugate

2 ml solution of BSA-carbene conjugate prepared according to the above procedure was added dropwise for 1 minute to 2 ml of 1 mM aqueous hydrogen tetrachloroaurate solution. Incubated at 25 °C for 2 days. The solution turned red slowly with a very characteristic surface plasmon centred at 530 nm in the UV-vis spectrum.

### D. UV-vis absorption spectroscopy

UV-vis spectra of the gold nanoparticle prepared from the carbene complex **1** were recorded by diluting prepared gold colloidal solutions four times with water on a Varian Cary 50 Bio spectrophotometer. The spectral background absorption was subtracted by using the UV-vis spectra of the same solvent mixture.

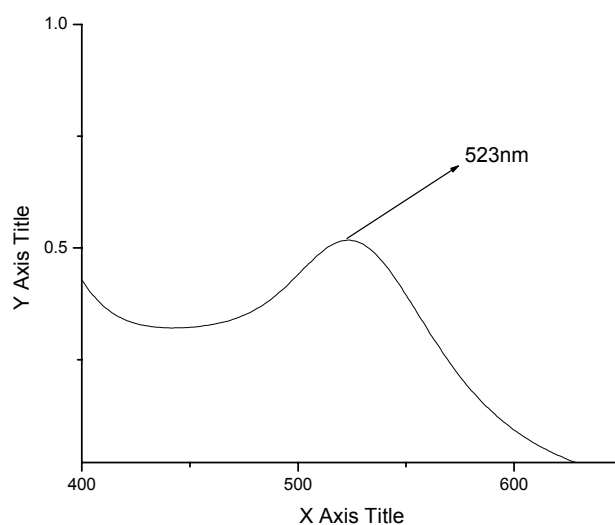

**Figure S3.** UV- vis spectra of gold nanoparticles in aqueous medium synthesized from aq.  $\text{HAuCl}_4$  (1mM) with Fischer carbene **1**(1mM) aq. Solution.

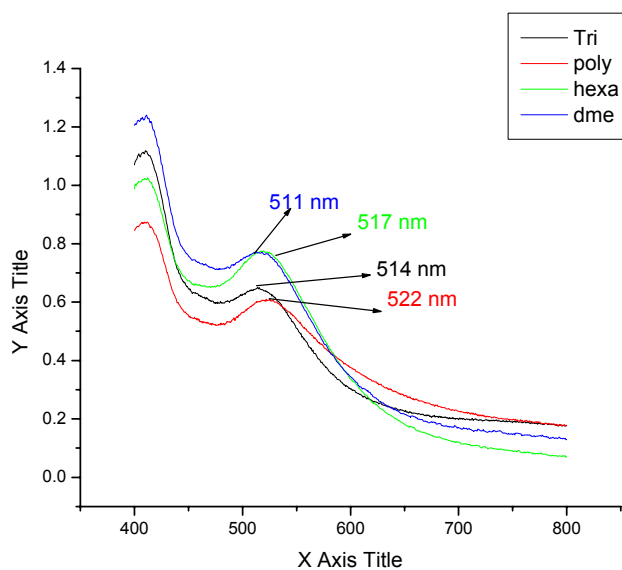

**Figure S4.** UV- vis spectrums of gold nanoparticles in water using carbene salt **2** (1mM) with 0.01mM aq.  $\text{HAuCl}_4$  in presence of oligoethyleneglycol dimethyl ethers with different chain lengths; (dme (n=1), tri (n=3), hexa (n=6), poly (avg n=11)).

## E. Copies of NMR spectra

Figure S5. Proton NMR spectra of carbene complex 1

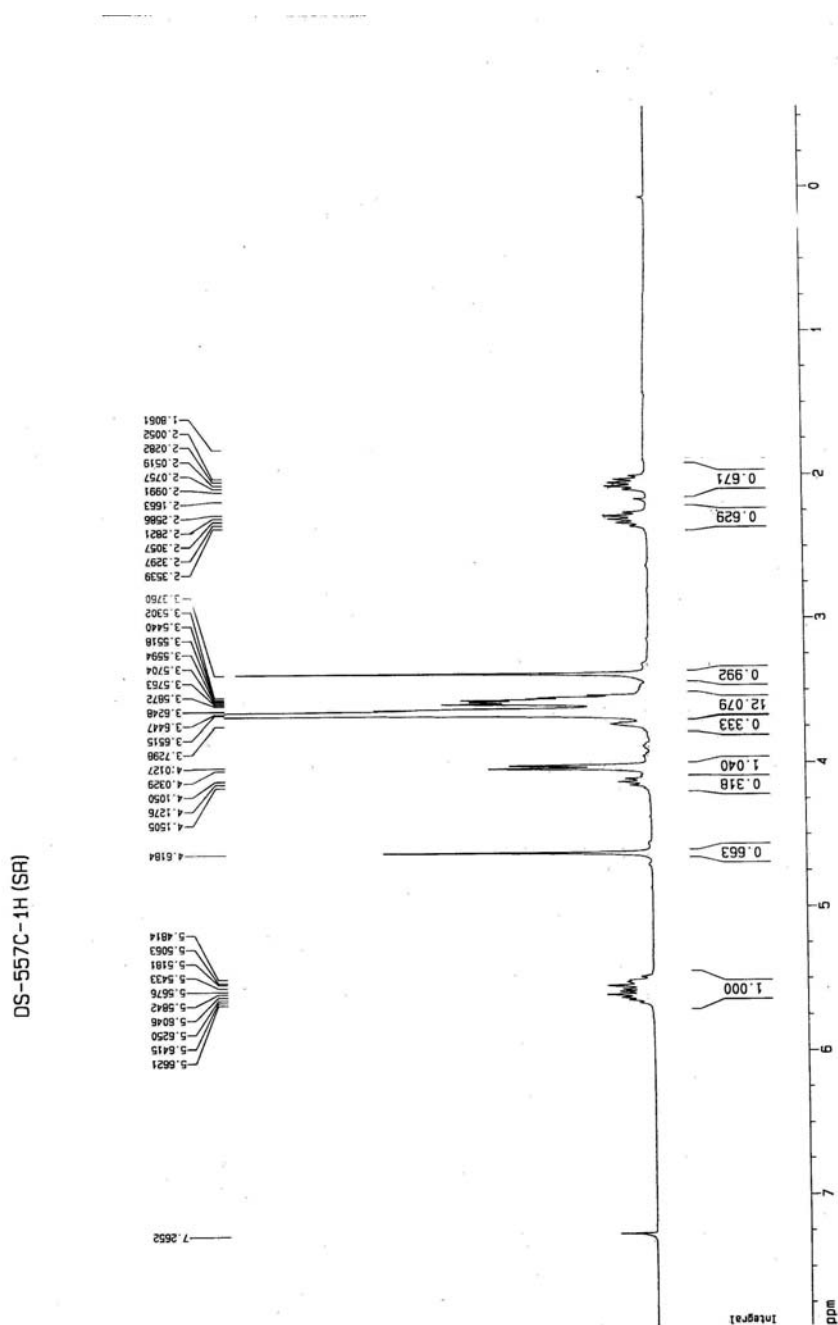

**Figure S6.**  $C^{13}$  NMR spectra of carbene complex **1**

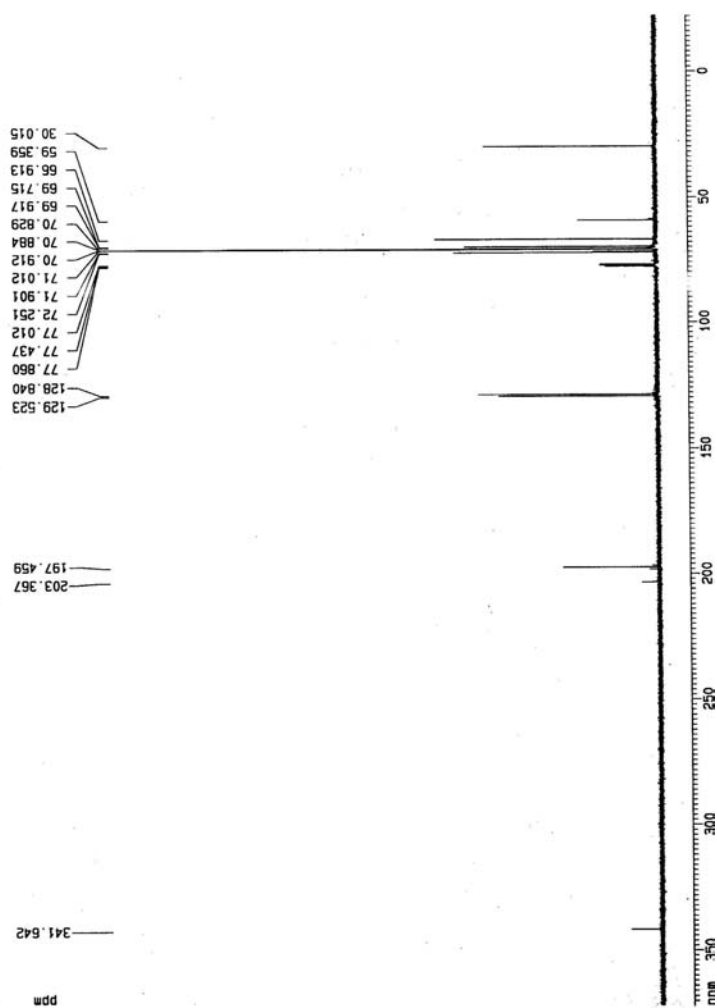



# Supplementary Material (ESI) for Chemical Communications

# This journal is (c) The Royal Society of Chemistry 2006

*Figure S7.* DEPT NMR of carbene complex **1**

# Supplementary Material (ESI) for Chemical Communications

# This journal is (c) The Royal Society of Chemistry 2006

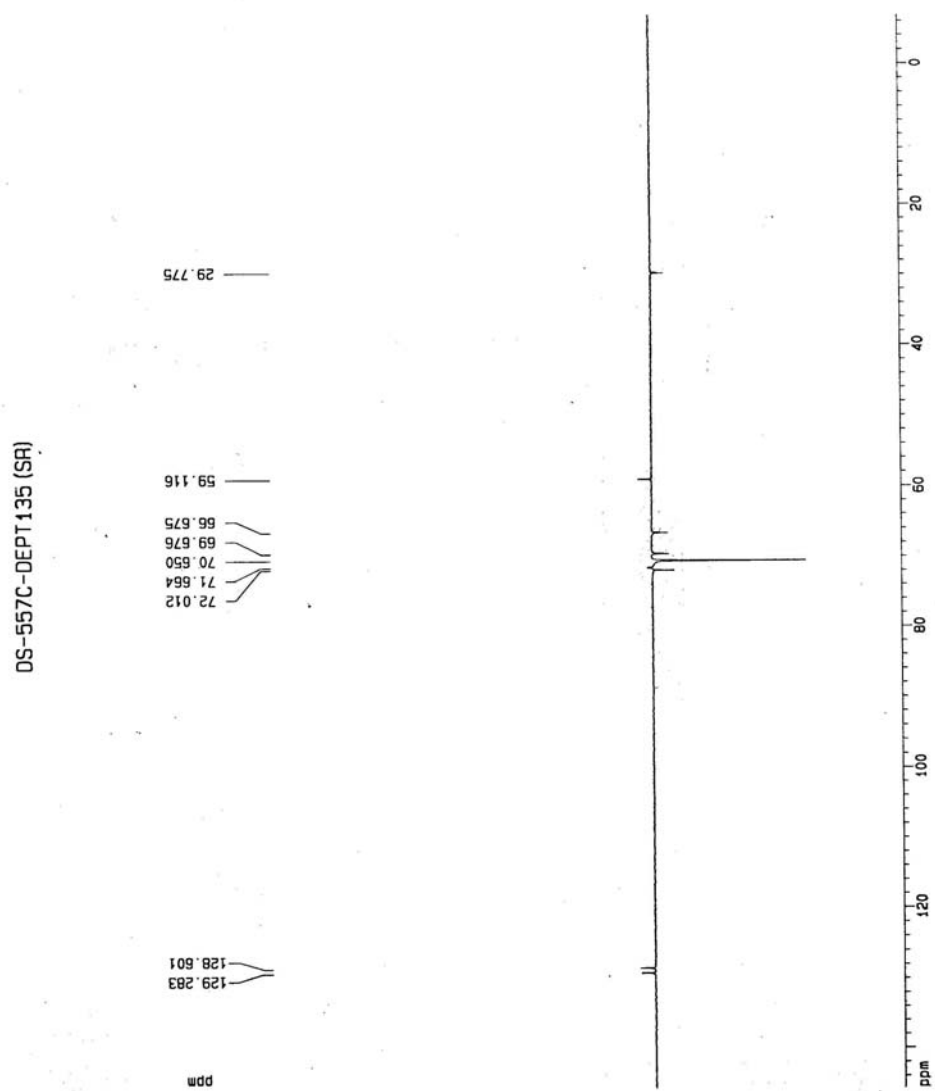

**Figure S8.** Proton NMR spectra of compound **ii**

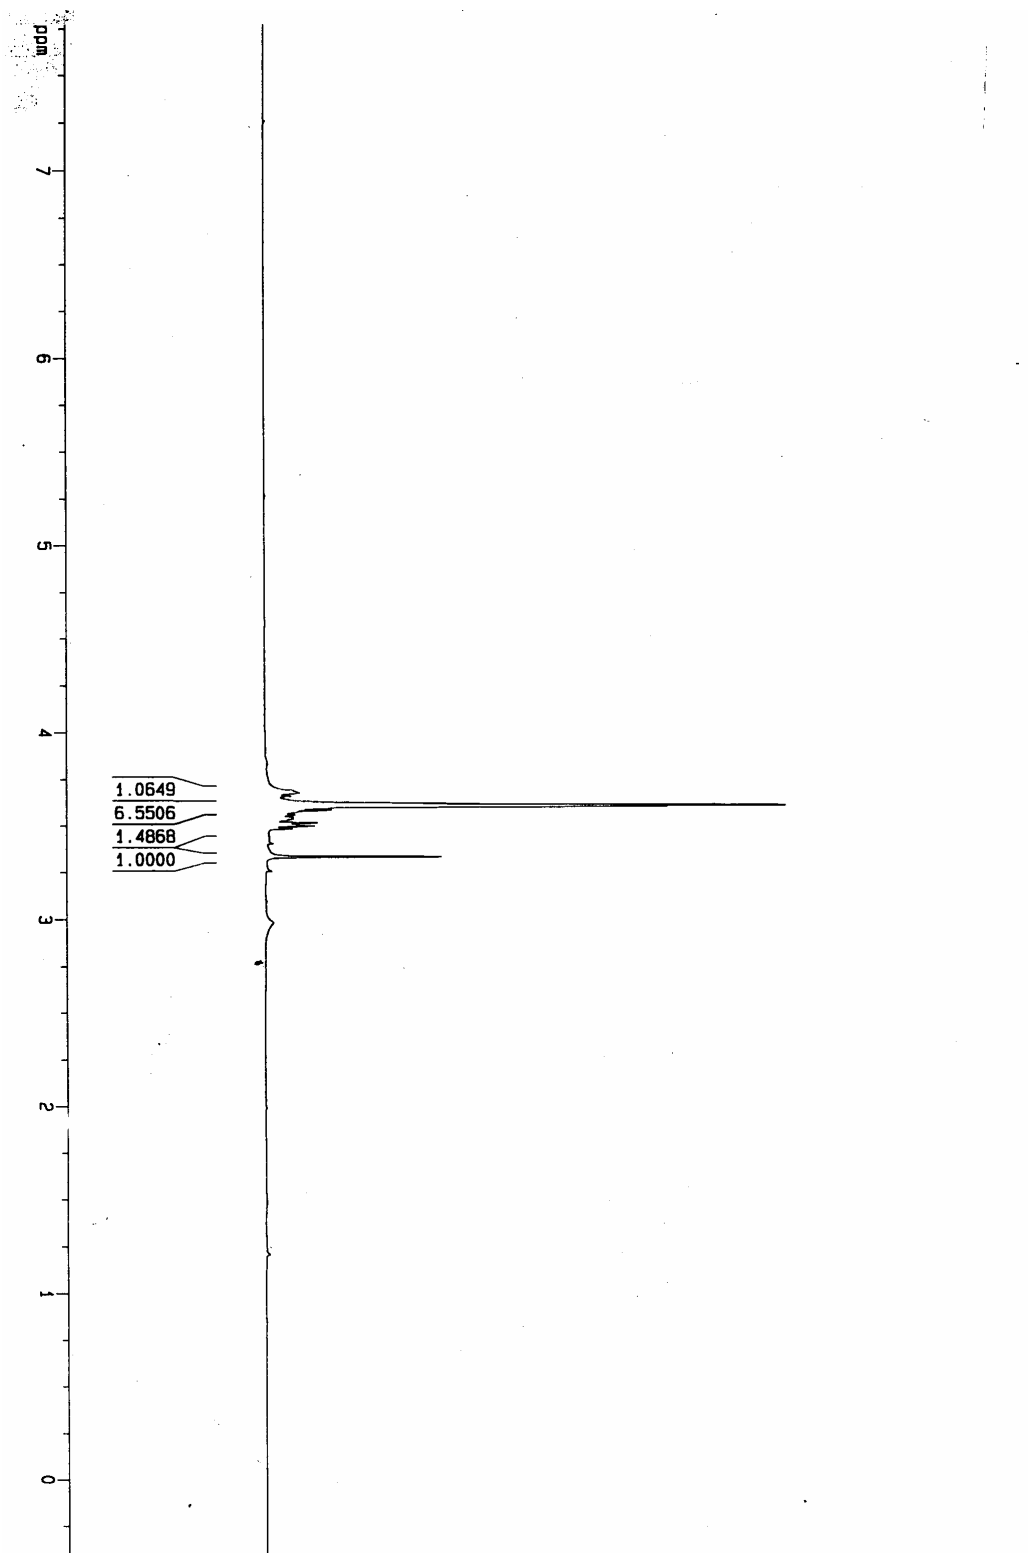

# Supplementary Material (ESI) for Chemical Communications

# This journal is (c) The Royal Society of Chemistry 2006

*Figure S9.*  $C^{13}$  NMR spectra of compound ii

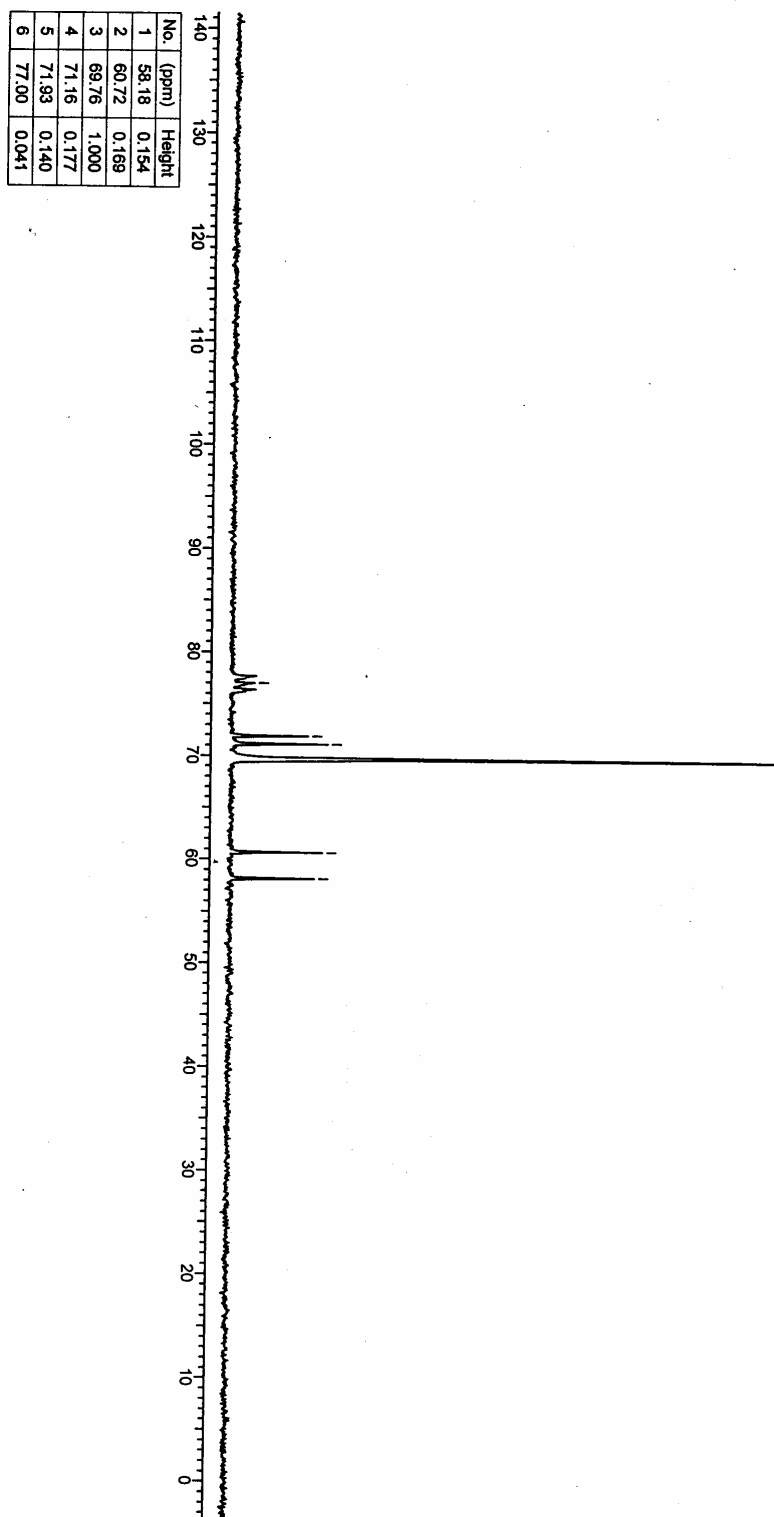

**Figure S10.** DEPT NMR spectra of compound **ii**

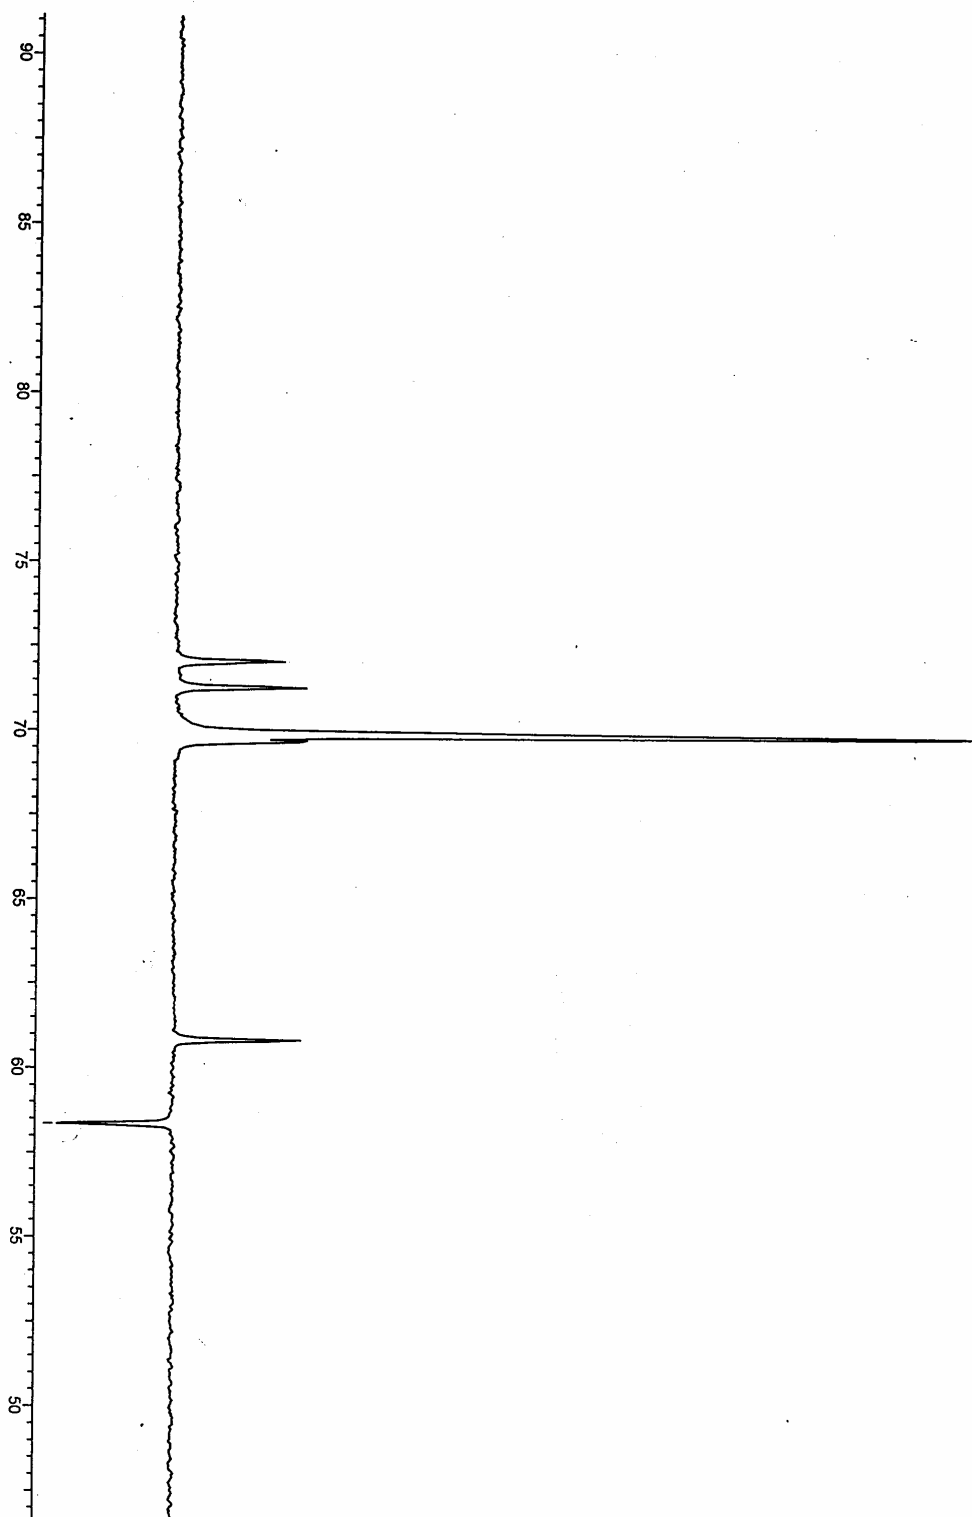

Figure S11. Proton NMR spectra of compound **iii**

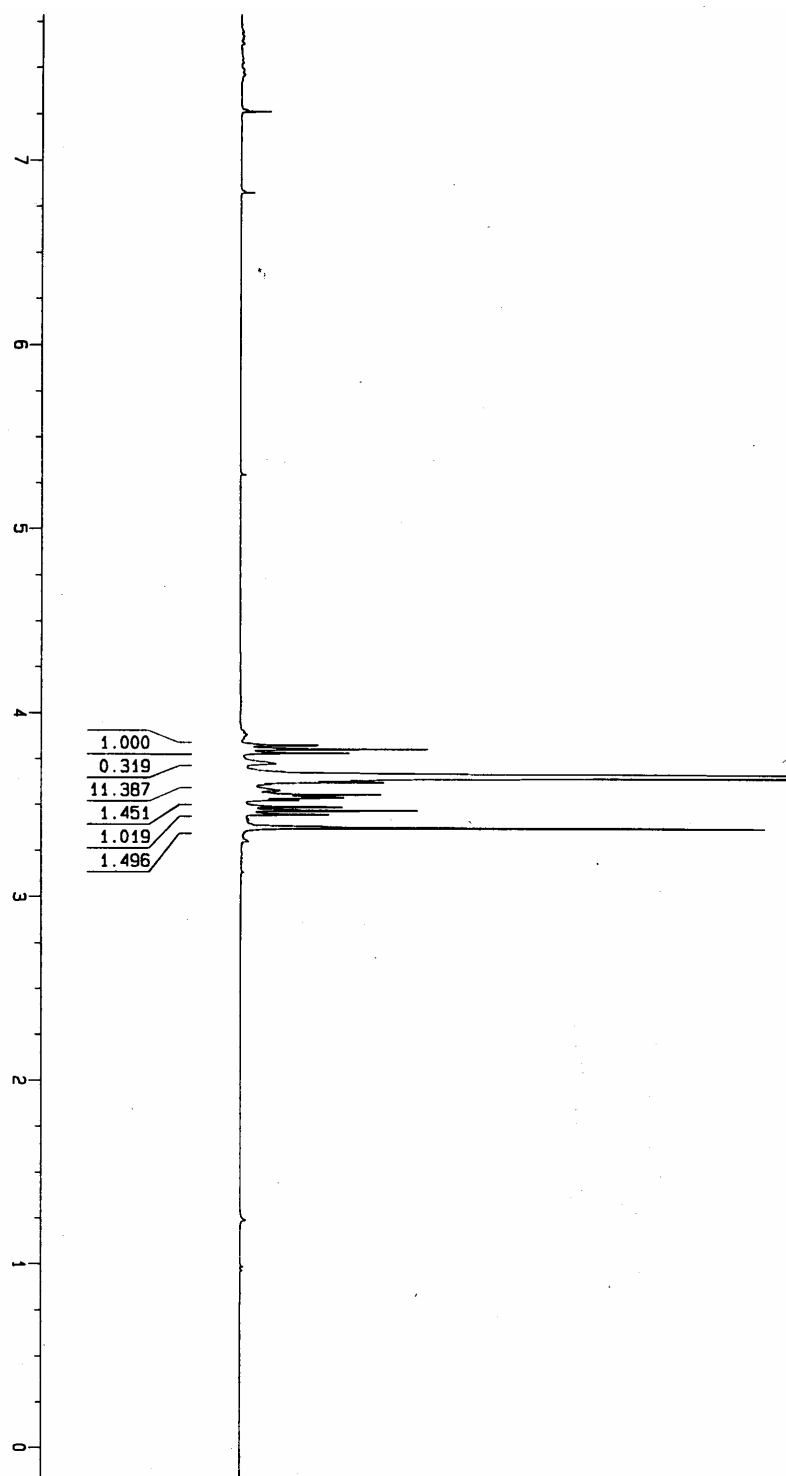

# Supplementary Material (ESI) for Chemical Communications

# This journal is (c) The Royal Society of Chemistry 2006

*Figure S12.*  $C^{13}$  NMR spectra of compound **iii**



SS16-1H (SKD)

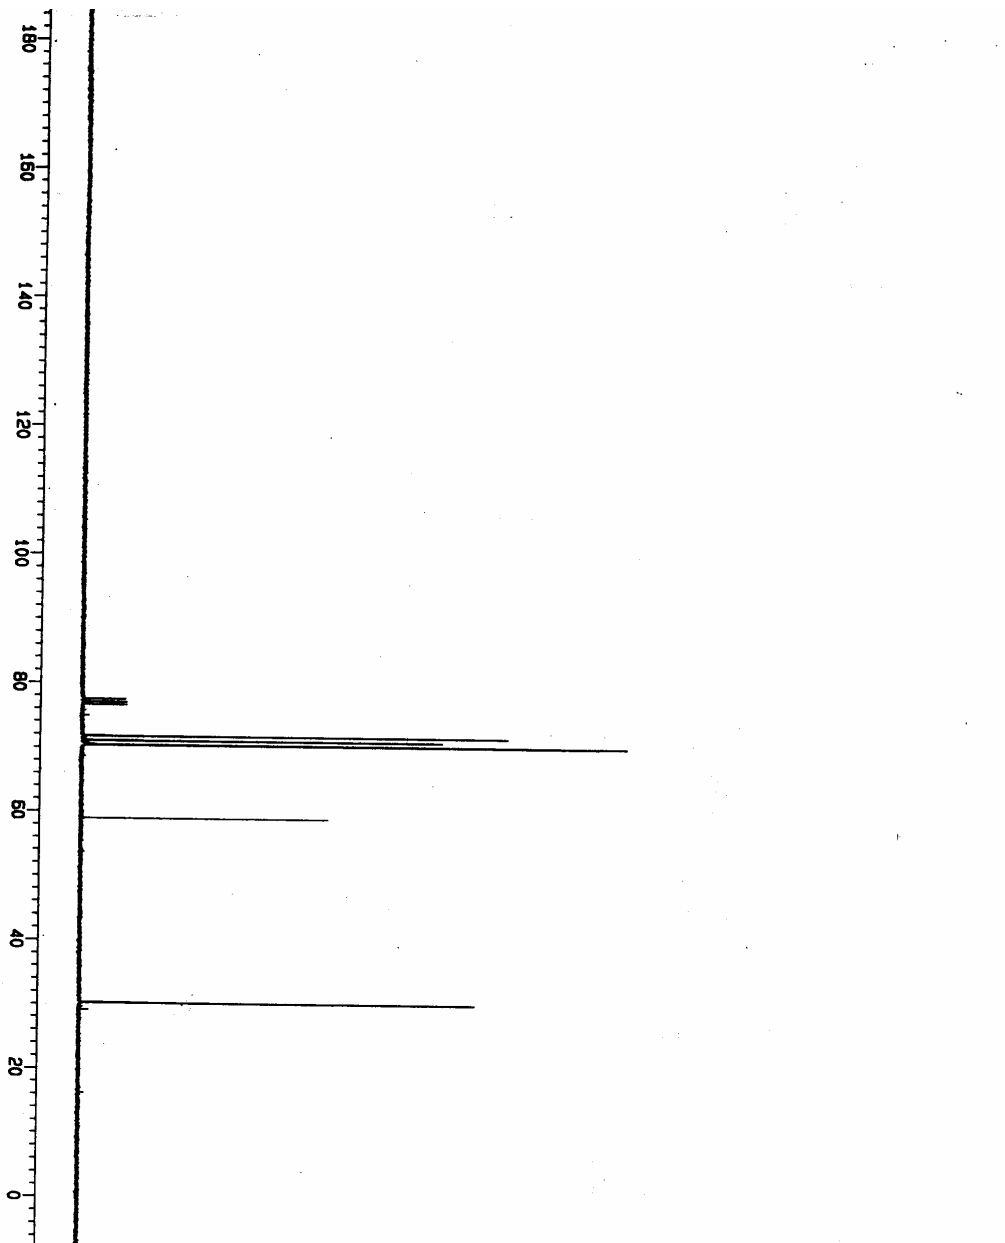

Current Data Parameters  
 NAME SS16-13C  
 EXPNO 1  
 PROCNO 1

F2 - Acquisition Parameters

Date\_ 500000  
 Time 9.48  
 INSTRUM dpx300  
 PROBHD 5 mm Multinu  
 PULPROG zgpg  
 TD 65576  
 SOLVENT CDCl3  
 NS 1815  
 DS 0

SNH 21645.021 Hz  
 FIDRES 0.250012 Hz  
 AQ 1.9999557 sec  
 RG 8192

DM 23.100 usec  
 DE 4.50 usec  
 TE 300.0 K  
 .d11 0.0300000 sec  
 PL12 16.00 dB  
 CPDPRG2 waltz16

PCPD2 100.00 usec  
 SF02 300.1314106 MHz  
 NUC2 1H

PL2 120.00 dB  
 D1 1.00000000 sec  
 P1 6.70 usec  
 DE 4.50 usec

SF01 75.4772724 MHz  
 NUC1 13C  
 PL1 -6.00 dB

F2 - Processing parameters  
 SI 65636  
 SF 75.4677581 MHz  
 WDW EM  
 SSB 0  
 LB 0.30 Hz  
 GB 0  
 PC 1.00

1D NMR plot parameters  
 CX 22.00 cm  
 F1P 193.369 ppm  
 F1 14593.14 Hz  
 F2P -8.174 ppm  
 F2 -616.88 Hz

PPM/CN 9.16106 ppm/cm  
 HZ/CN 691.36432 Hz/cm

**Figure S13.** Proton NMR spectra of compound **iv**

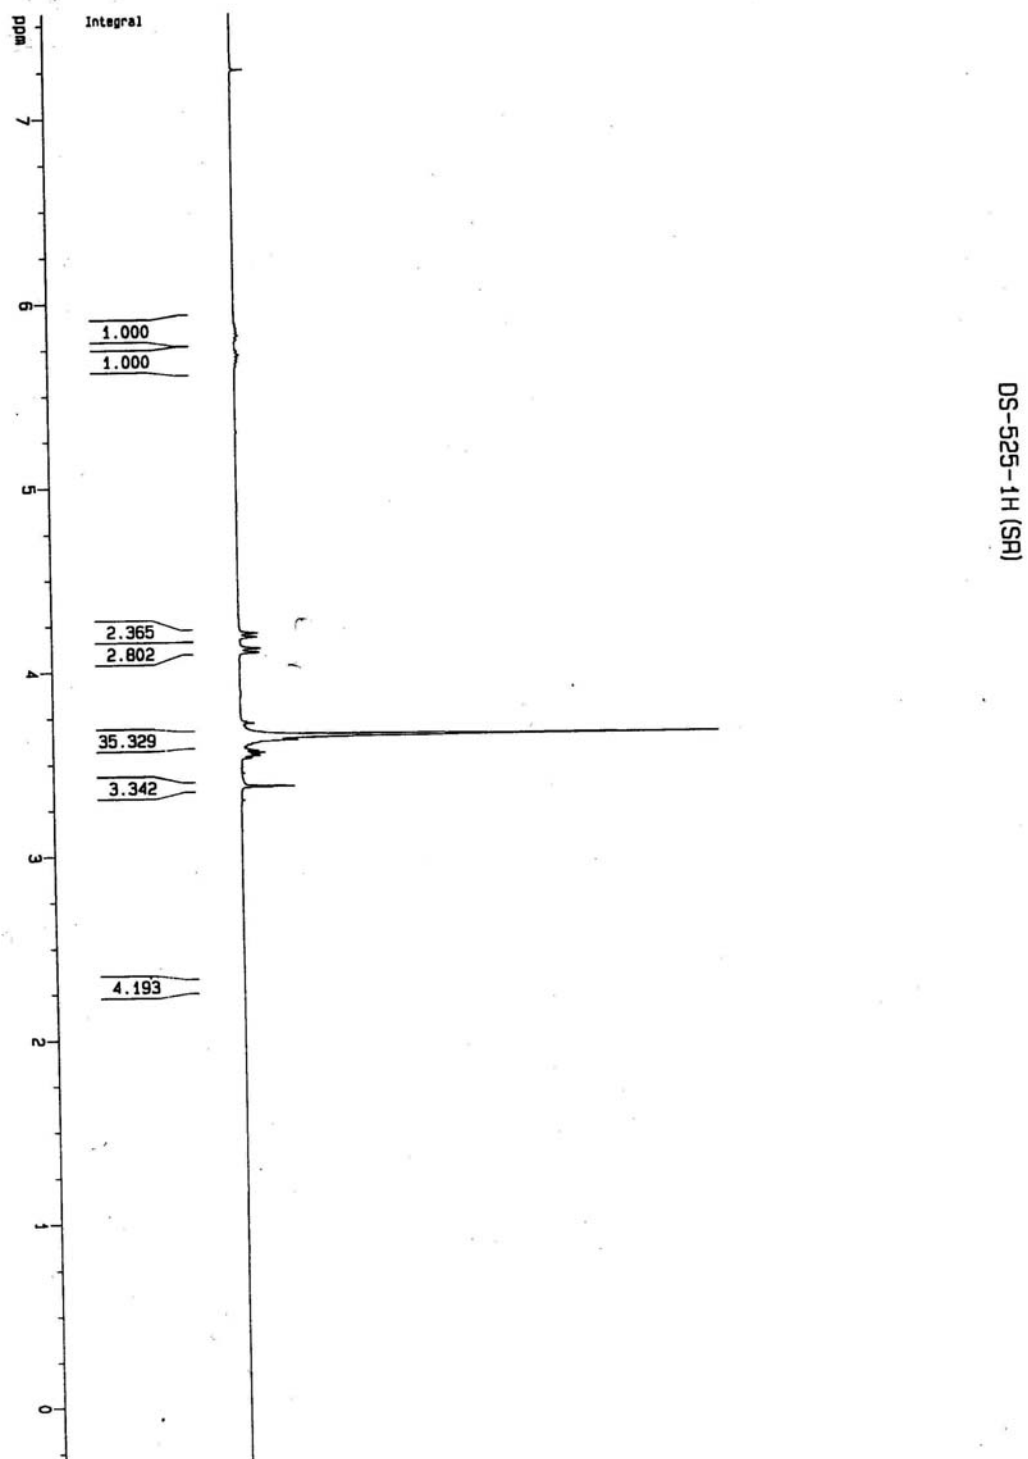

Figure S14.  $C^{13}$  NMR spectra of compound **iv**

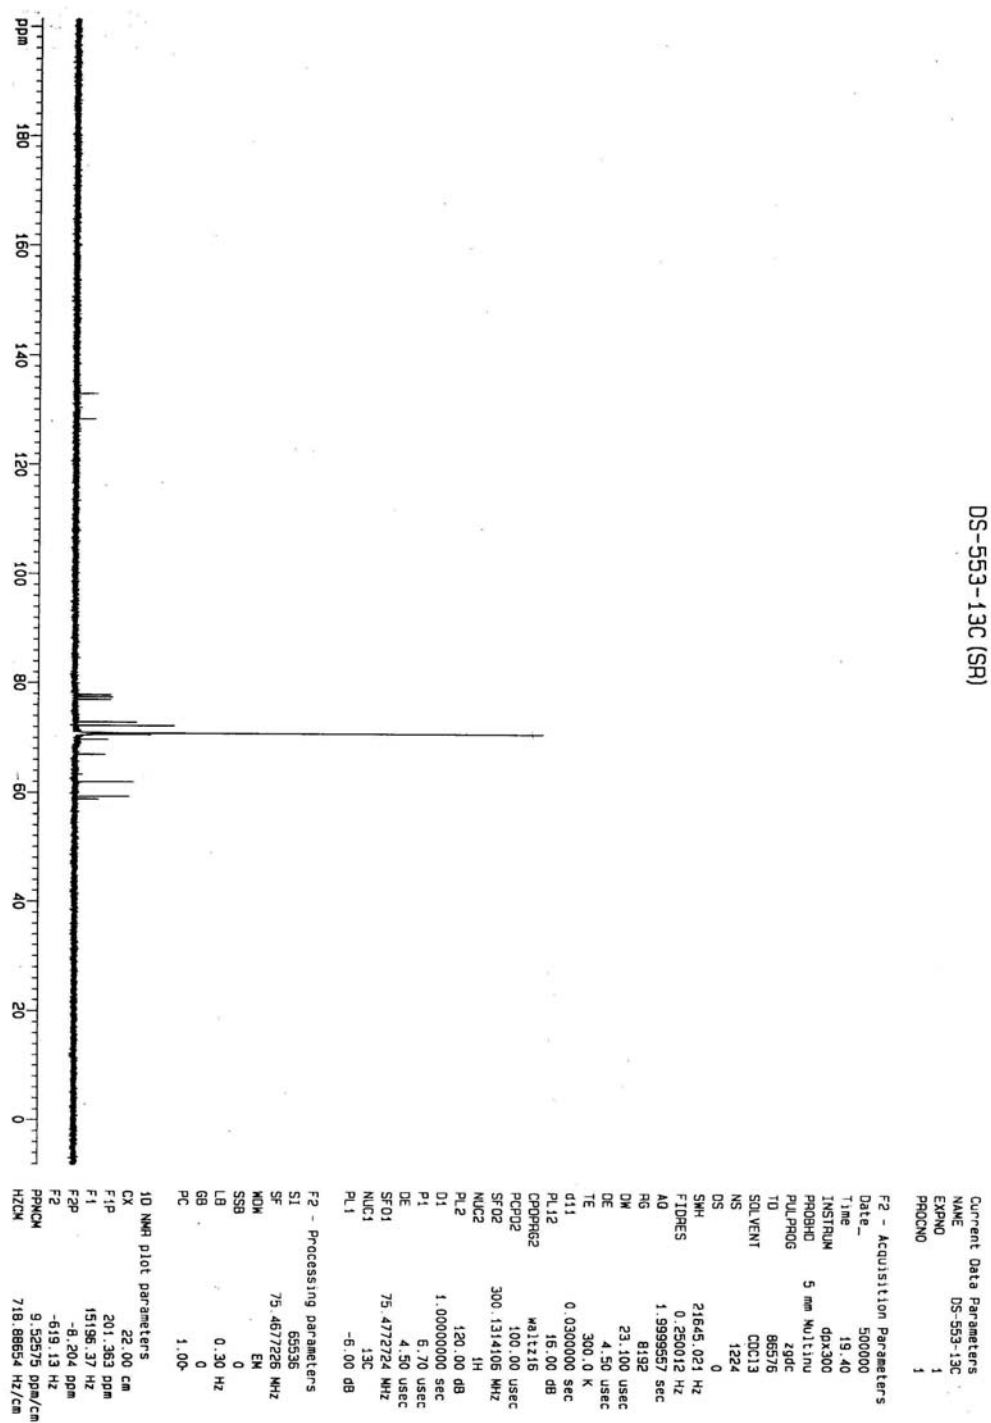

Figure S15. DEPT NMR spectrum of compound **iv**

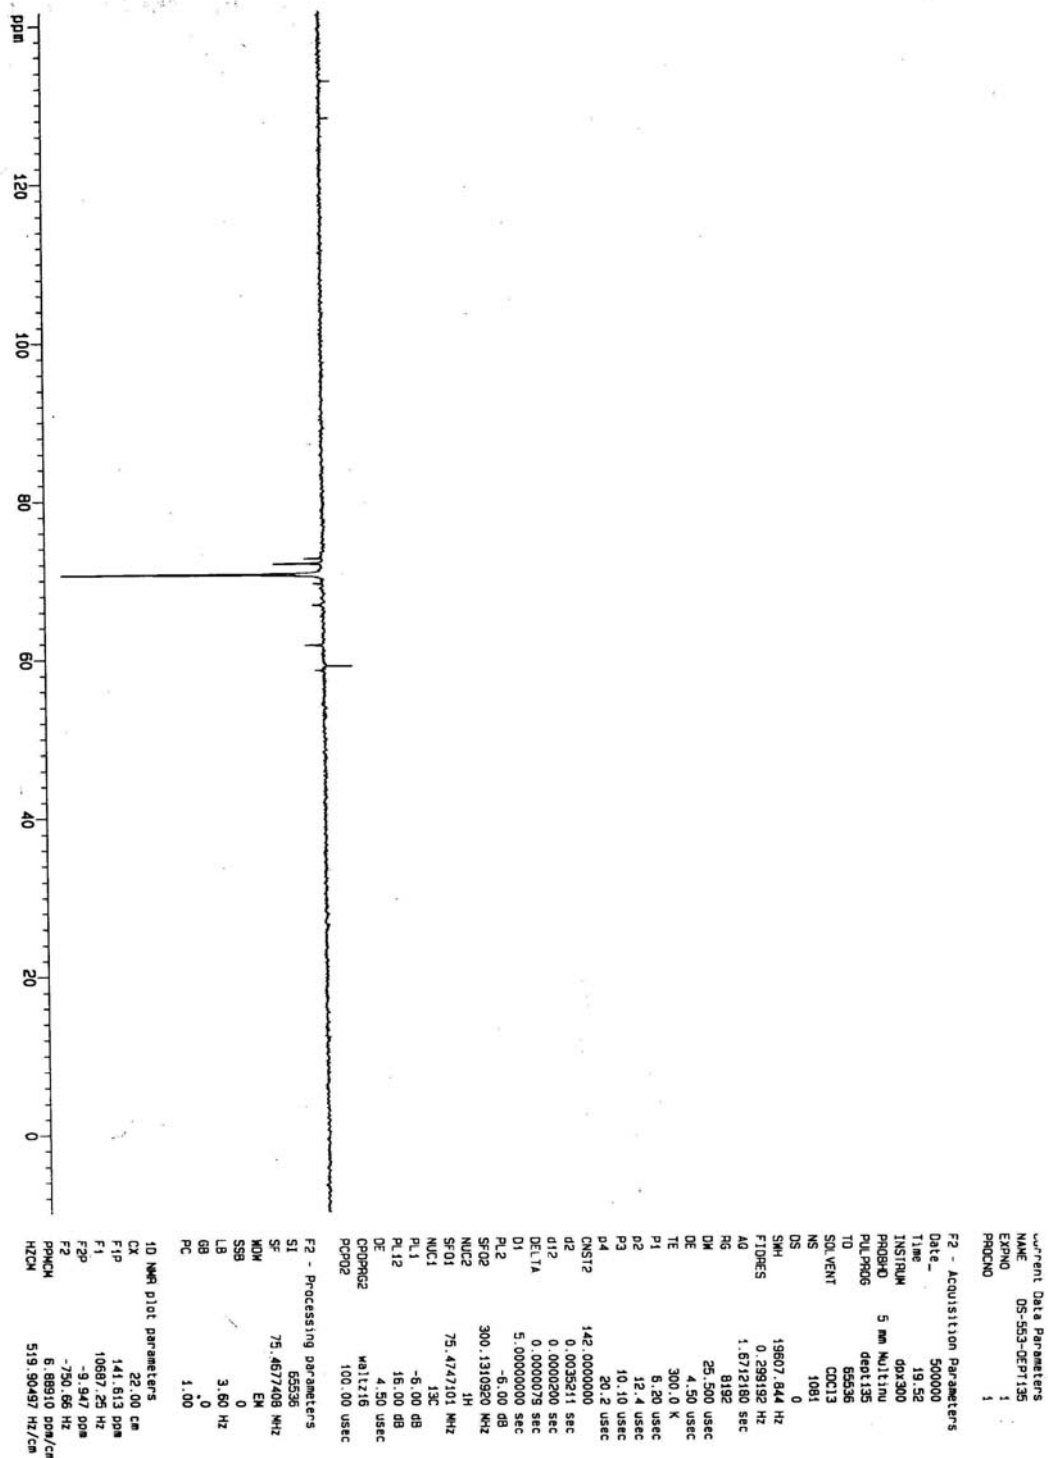

Figure S16. Proton NMR spectra of compound v

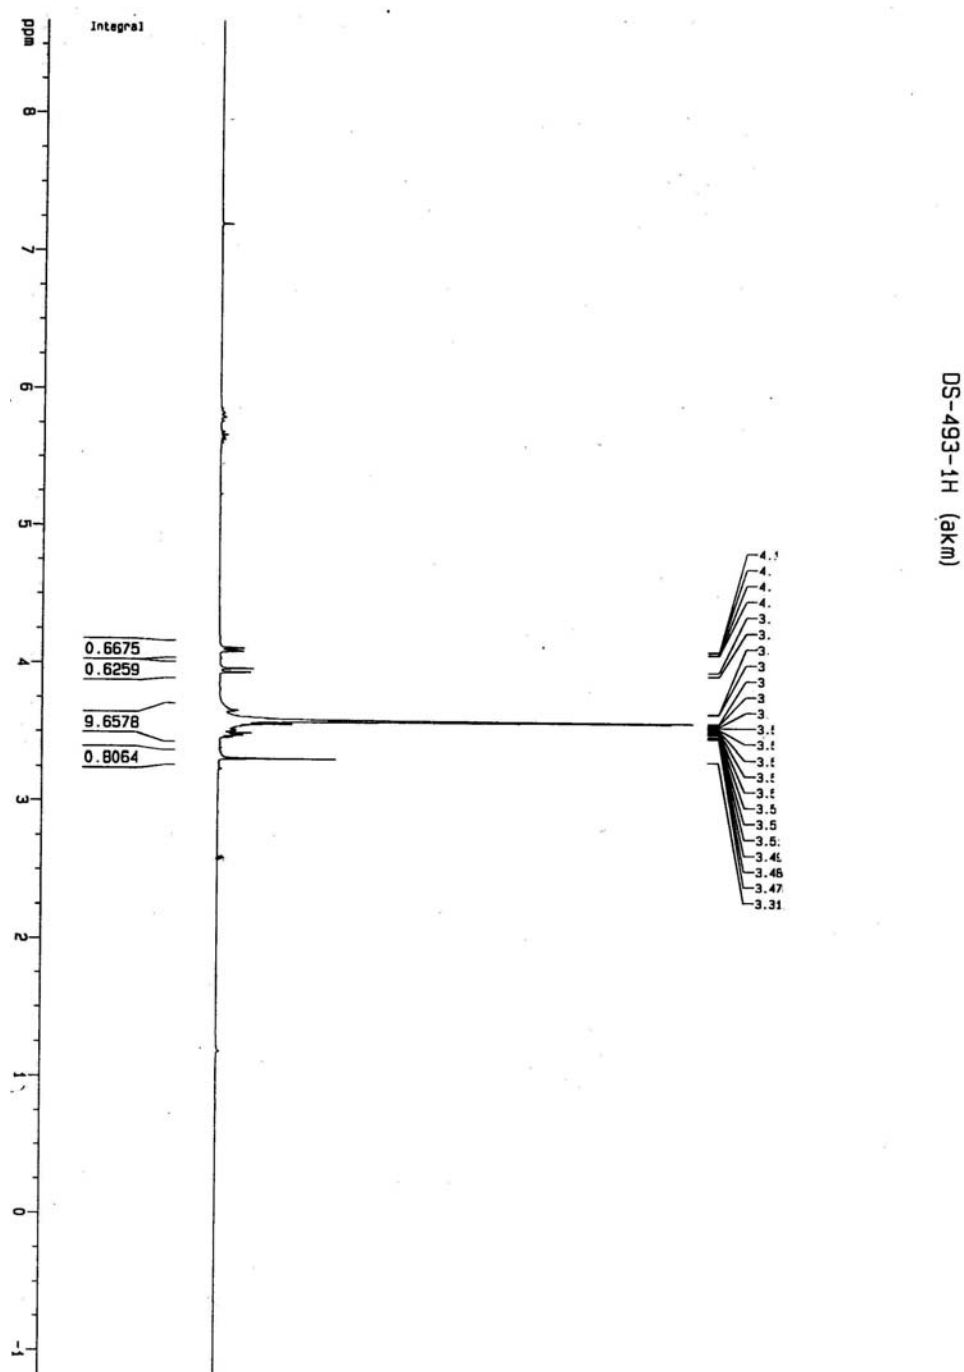

Figure S17. C13 NMR spectra of compound v

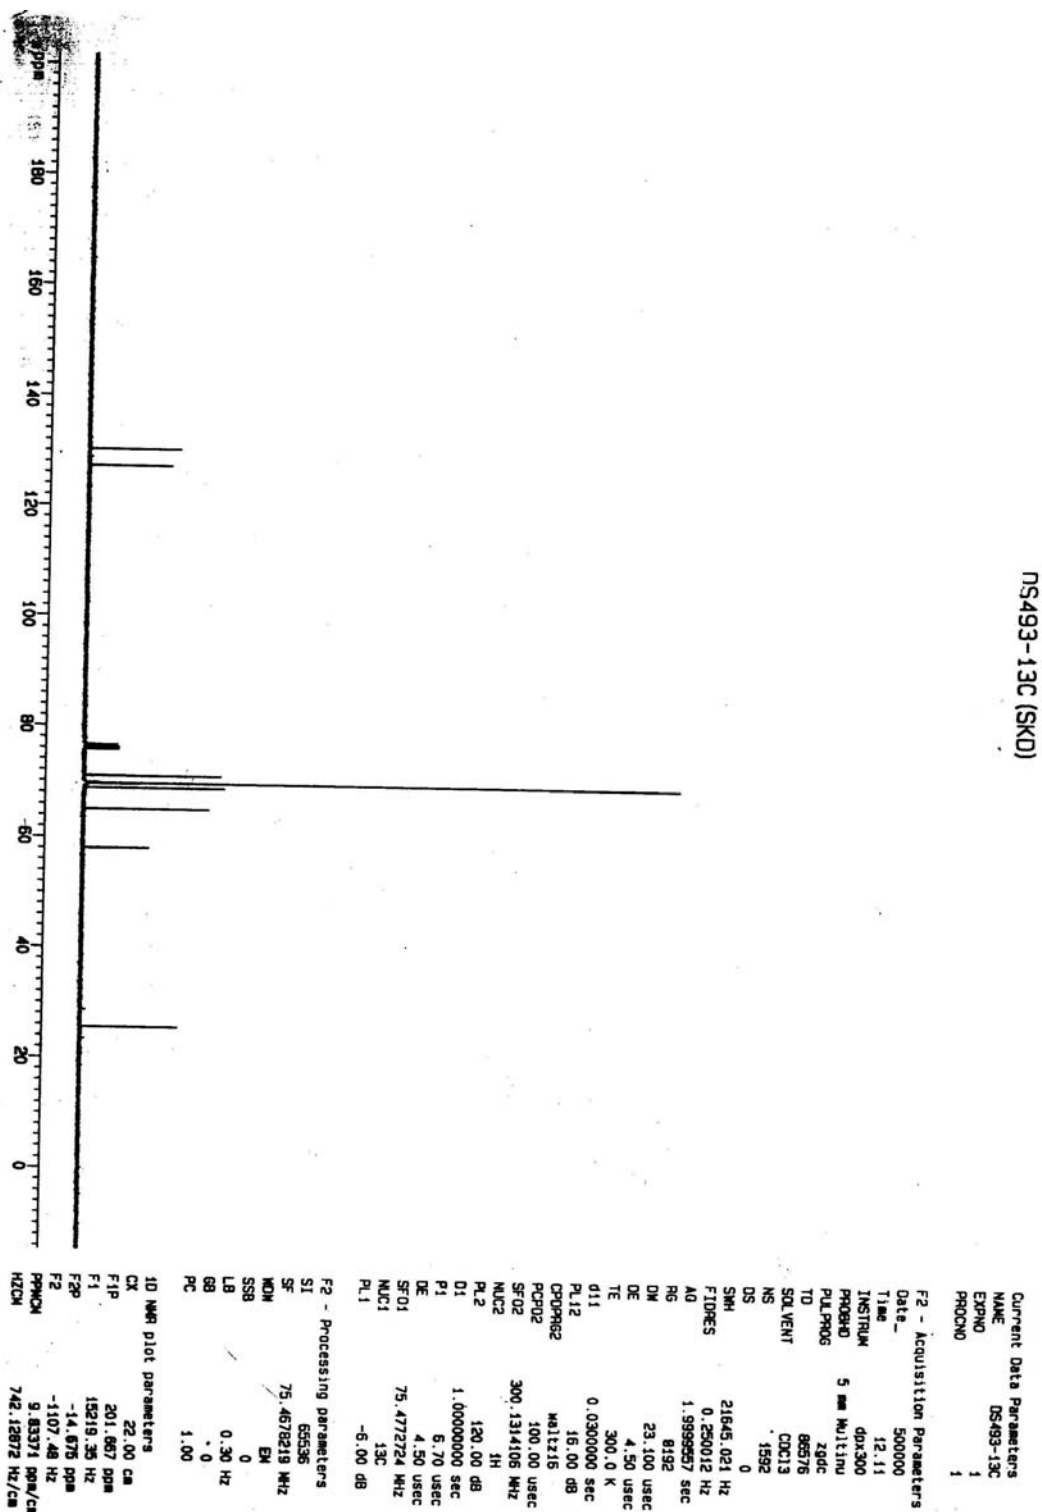

Figure S18. DEPT NMR spectra of compound v

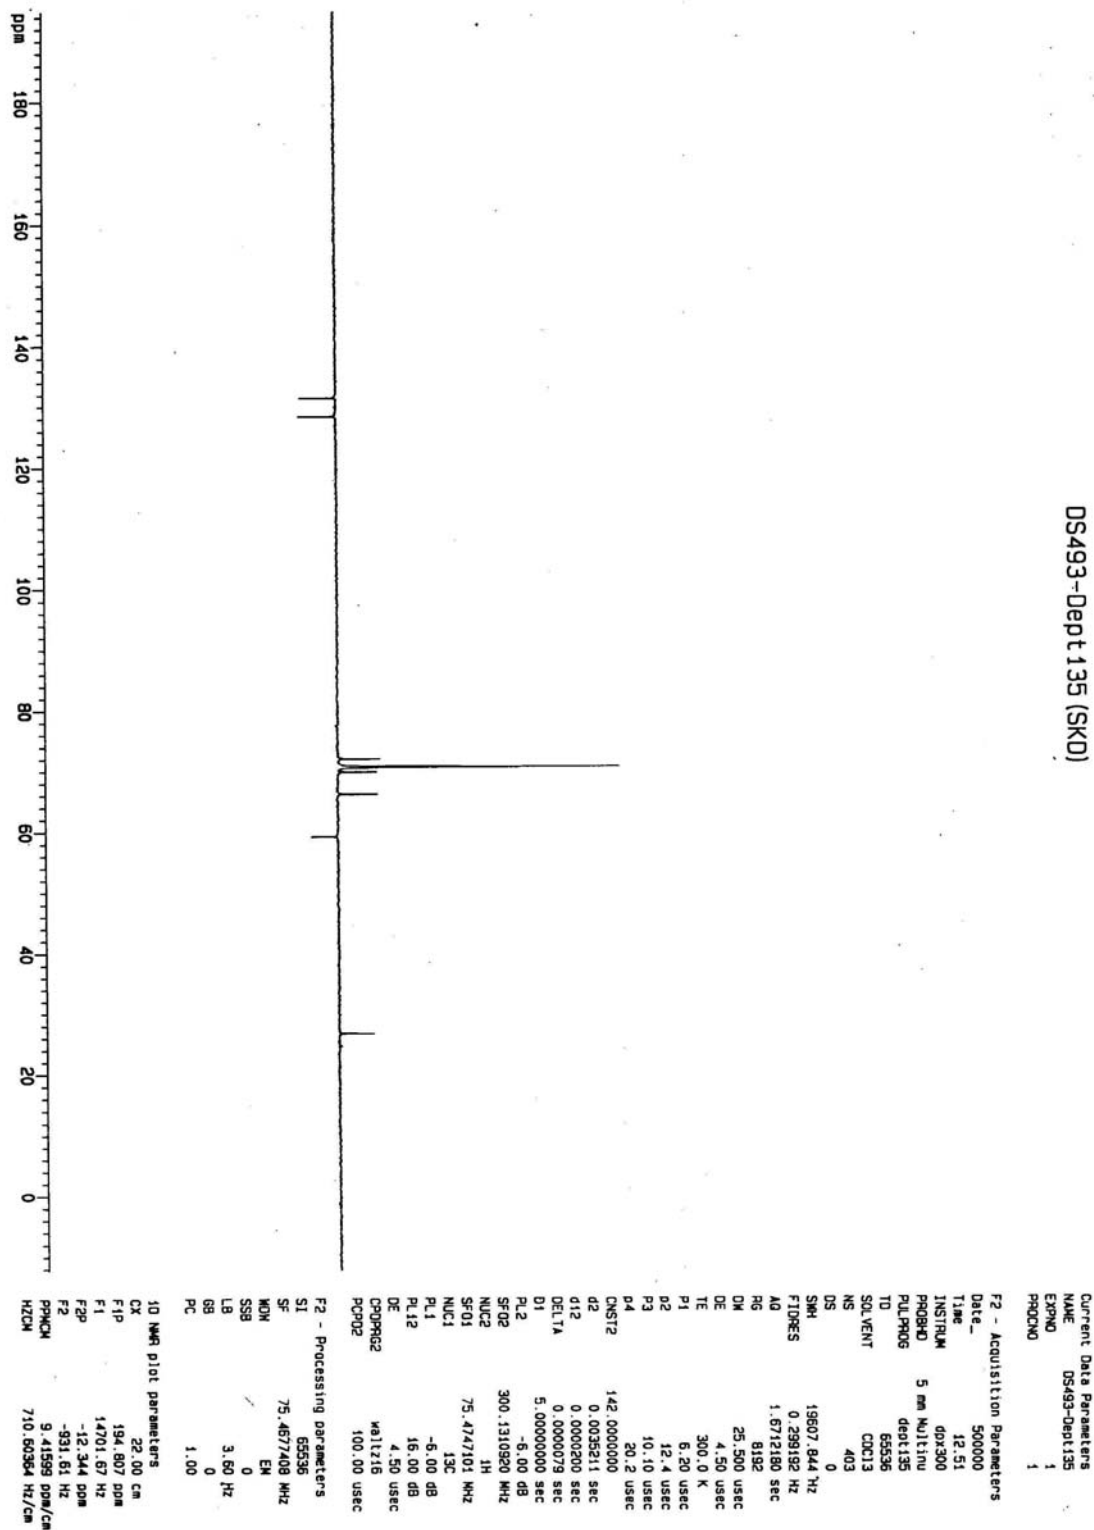

## F. TEM measurements

TEM measurements on the gold nanoparticle films cast onto carbon-coated TEM grids were carried out on a JEOL model 1200EX instrument at an accelerating voltage of 120 kV.

*Figure S19.* TEM micrograph of AuNPs generated with Fischer Carbene salt **2** and dimethoxyethane

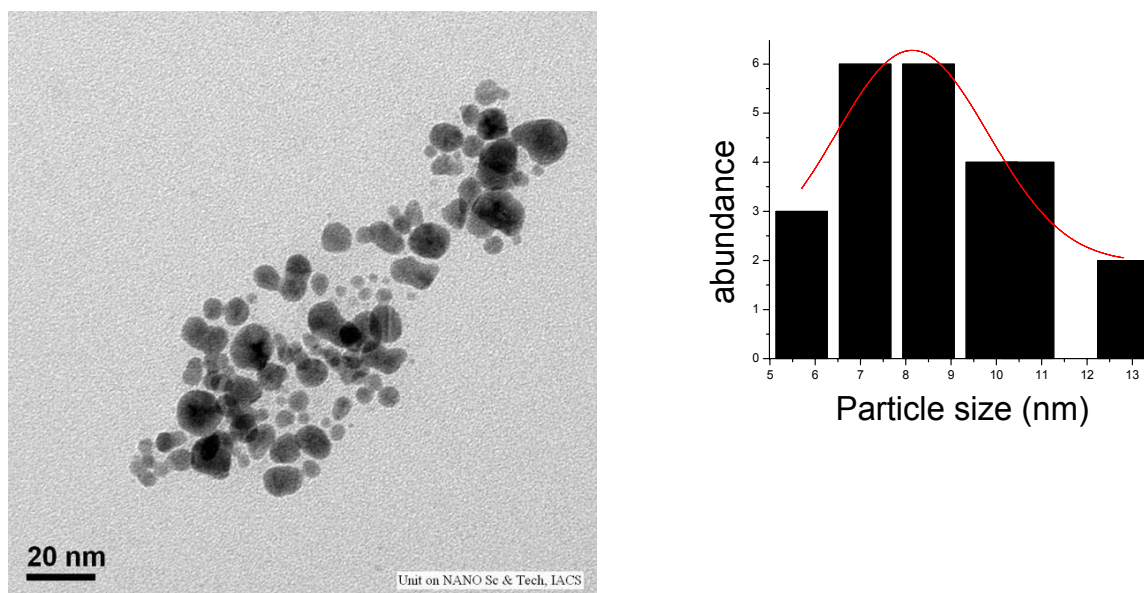



**Figure S20.** TEM micrograph of AuNPs generated with Fischer carbene salt **2** and triethylene glycol dimethyl ether

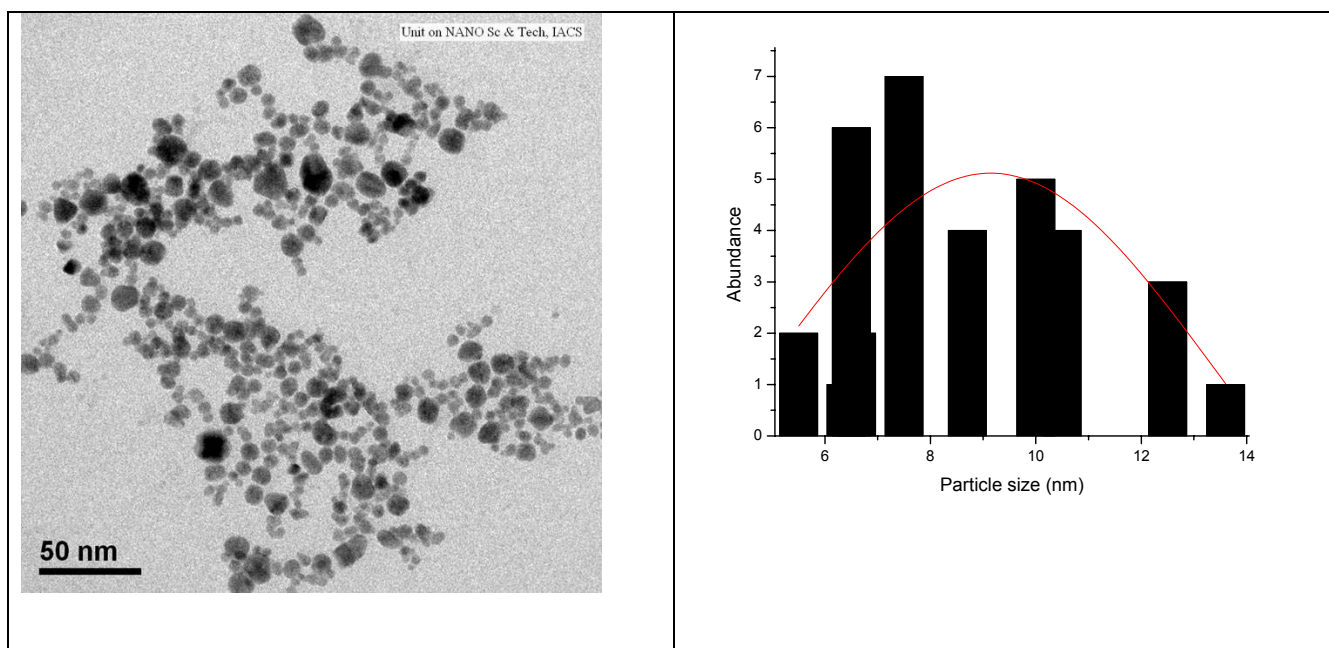

**Figure S21.** TEM micrograph of AuNPs generated with Fischer carbene salt **2** and hexaethylene glycol diallylether

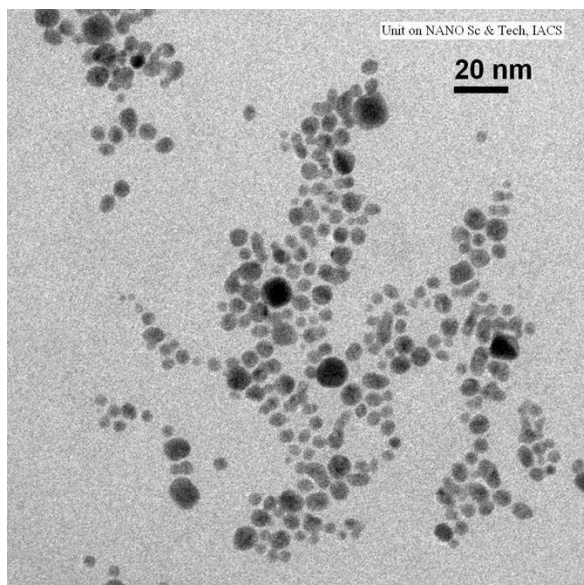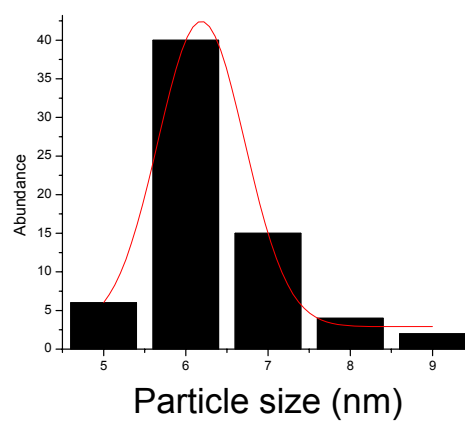

*Figure S22.* TEM micrograph of AuNPs generated with Fischer carbene salt **2** and Polyethylene glycol demethyl ether

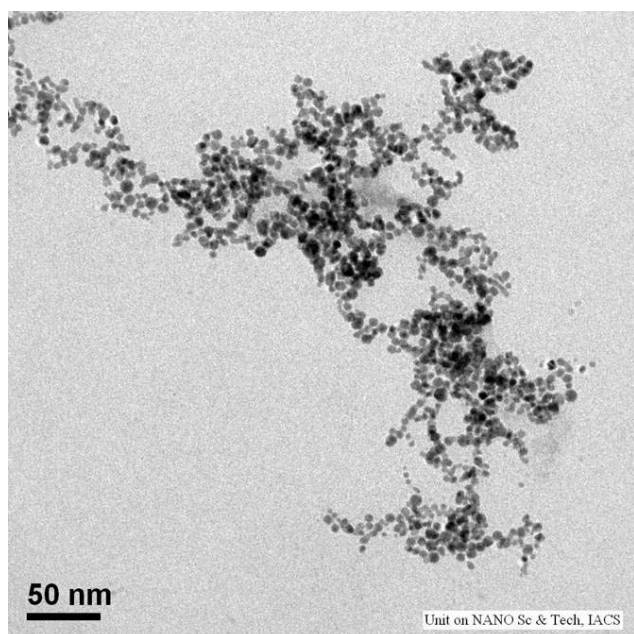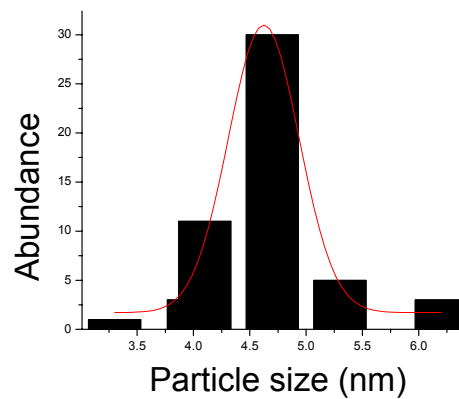

# Supplementary Material (ESI) for Chemical Communications

# This journal is (c) The Royal Society of Chemistry 2006

**REFERENCES:**

(1) Hoye, T. R.; Chen, K.; Vyvyan, J. R. *Organometallics* **1993**, *12*, 2806.

(2) Salmay, M.; Licandro, E.; Baldoli, C.; Maiorana, S.; T.-Huy, H.; Jaouen, G. *J. Organomet. Chem.* **2001**, *617-618*, 376.

(3) M. M. Bradford, *Anal. Biochem.* **1976**, *72*, 248.
